# Supplementary material for: Perinatal factors affect the gut microbiota up to four years after birth
Source: PubMed Central journal article supplement (PMC6447568; doi:10.1038/s41467-019-09252-4), 2019-04-03
Supplement: 41467_2019_9252_MOESM1_ESM.pdf [file 41467_2019_9252_MOESM1_ESM.pdf]

# **Microbiome Memory of perinatal factors that affect the gut microbiota four years after birth**

Fouhy F & Watkins C *et al.*

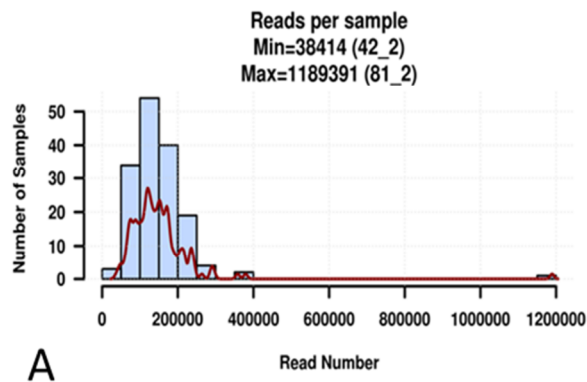

A

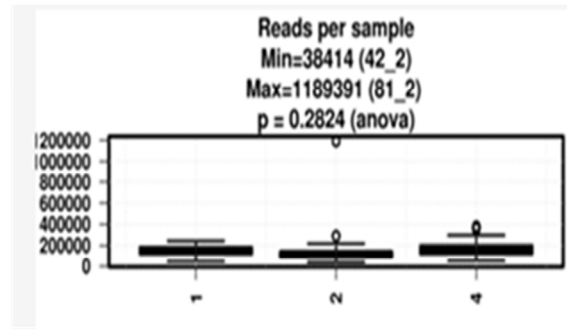

B

**Supplementary Fig.1: A** Numbers of reads per sample generated using 2x250bp Illumina MiSeq sequencing; **B** number of sequencing reads per sample by year of infant (1, 2 and 4)

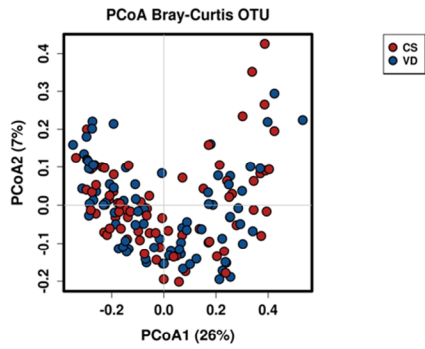

**A) Mode of Delivery**

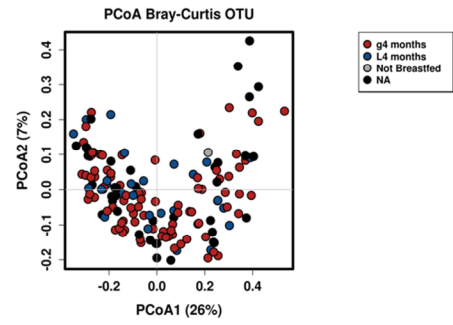

**B) Breastfeeding duration**

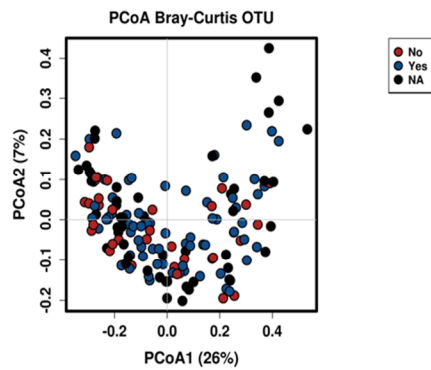

**C) Antibiotics taken during first year of life**

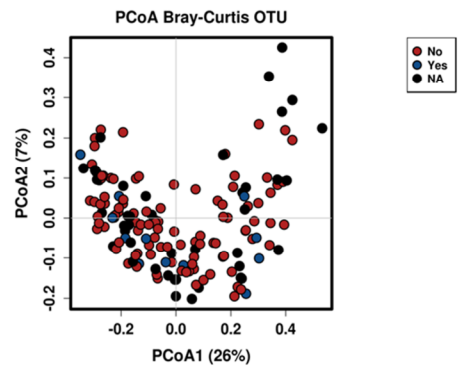

**D) Probiotic exposure in first year of life**

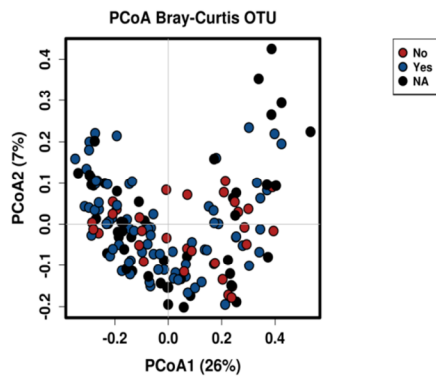

**E) Other Siblings**

**Supplementary Fig.2:** PCoA analysis using Bray-Curtis distance matrices based on; **A** Mode of delivery, **B** breastfeeding duration (g > 4, L < 4 months); **C** antibiotics taken during first year of life; **D** probiotic exposure in first year of life; **E** other siblings

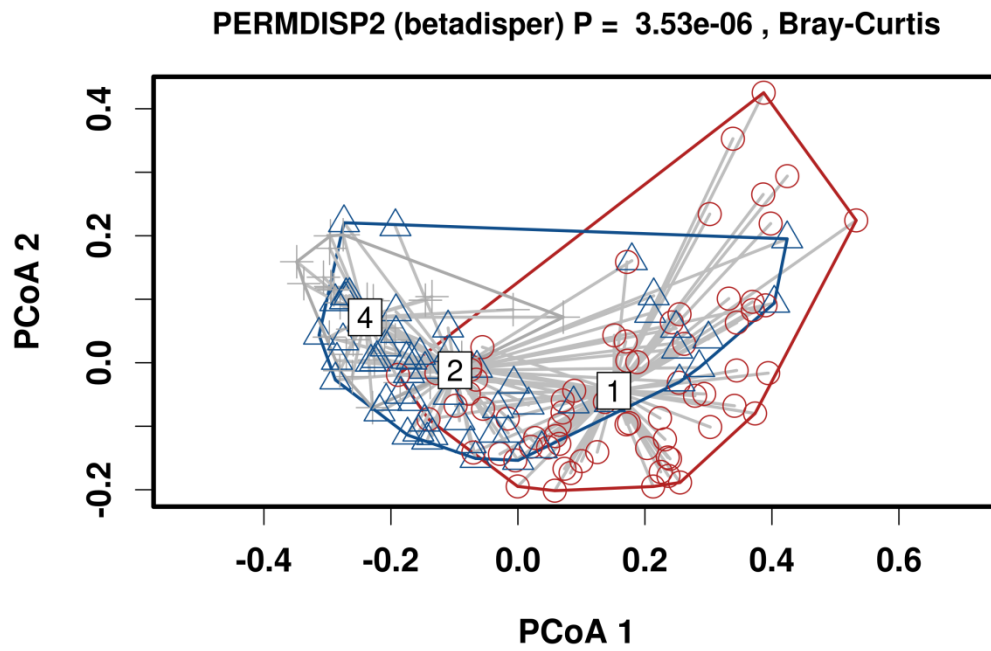

**Supplementary Fig. 3:** Microbiota composition was significantly different between groups based on year using PERMDISP2 permutational analysis. P-value is calculated based on distances of each sample to the group centroid in the PCoA and describes significance of the grouping

**A) Year one – Gestational age at birth.**

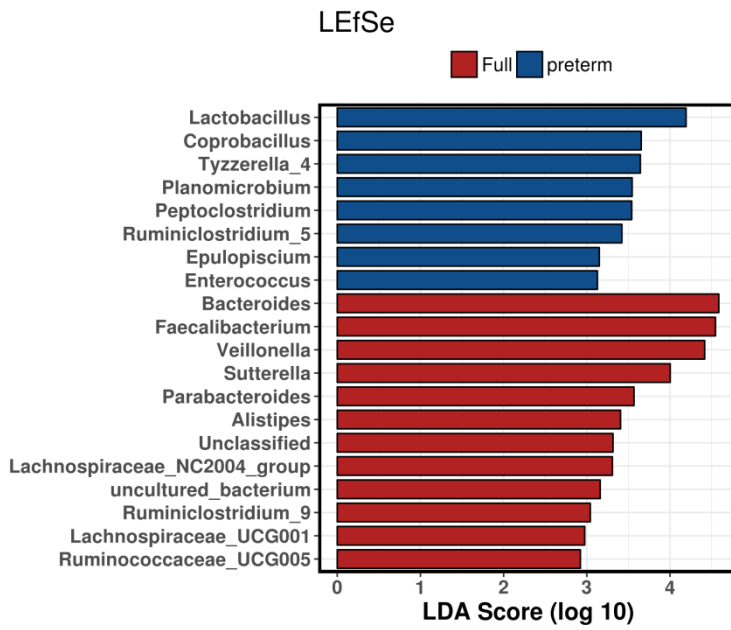

**B) Year two – Gestational age at birth.**

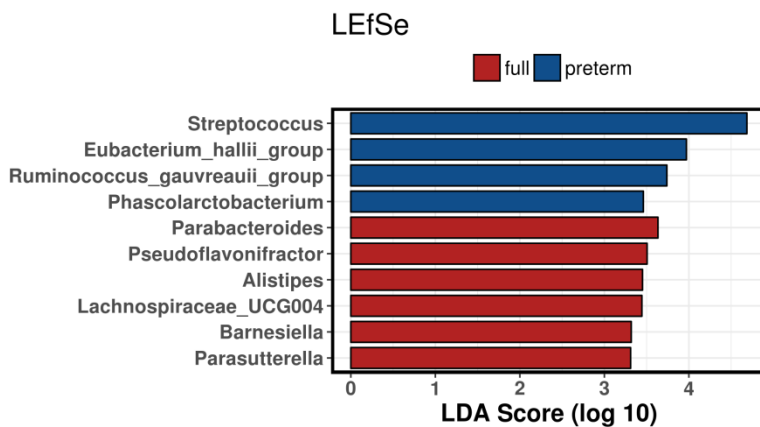

**C) Year four – Gestational age at birth.**

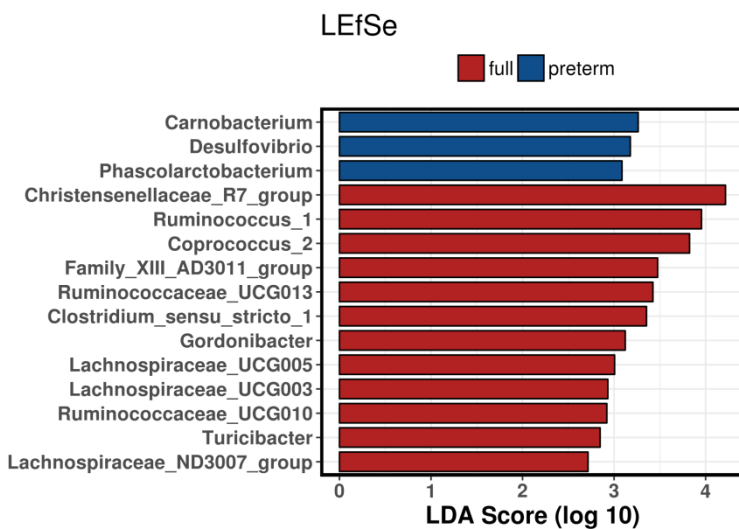

**Supplementary Fig. 4:** LDA Effect Size (LEfSe) analysis on gut microbiota composition based on gestational age at birth at A) year one, B) year two and C) year four

**A) Year one – Delivery mode.**

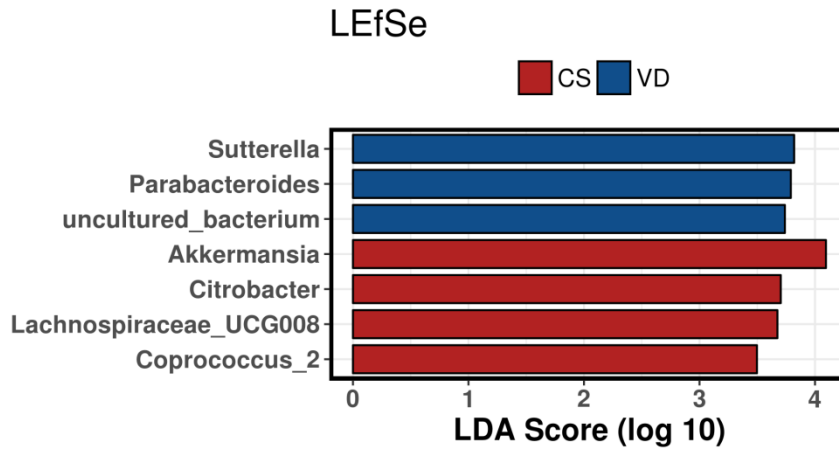

**B) Year two – Delivery mode.**

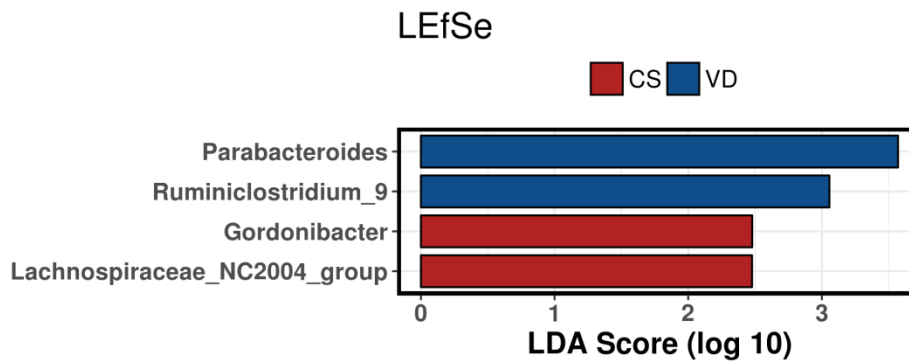

**C) Year four – Delivery mode.**

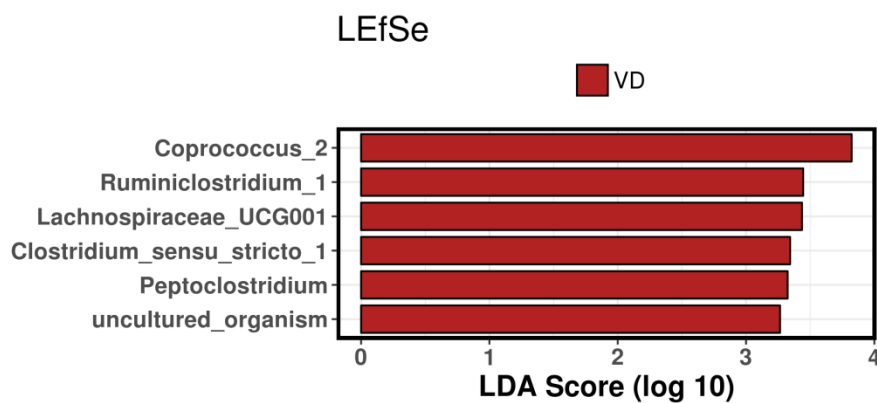

**Supplementary Fig. 5:** LDA Effect Size (LEfSe) analysis on gut microbiota composition based on mode of delivery at A) year one, B) year two and C) year four
